# Supplementary material for: Effect of Pore Structure on CO2 Adsorption Performance for ZnCl2/FeCl3/H2O(g) Co-Activated Walnut Shell-Based Biochar
Source: MDPI journal article supplement (doi:10.3390/atmos13071110), 2022-07-14
Supplement: s1 [file s1]

## Supplementary Material

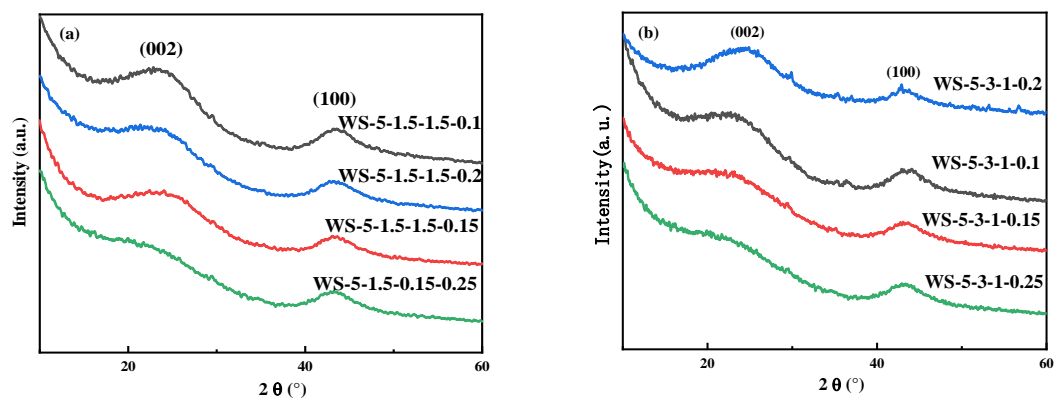

**Figure S1.** XRD spectra of (a) WS-5-1.5-1.5 and (b) WS-5-3-1 by different ratios of H<sub>2</sub>O(g) activation.

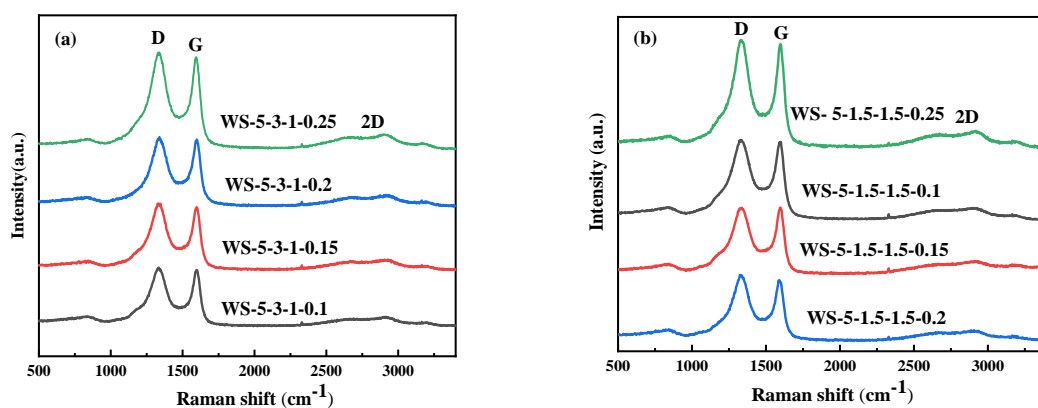

**Figure S2.** Raman spectra of (a) WS-5-1.5-1.5 and (b) WS-5-3-1 by different ratios of H<sub>2</sub>O(g) activation.

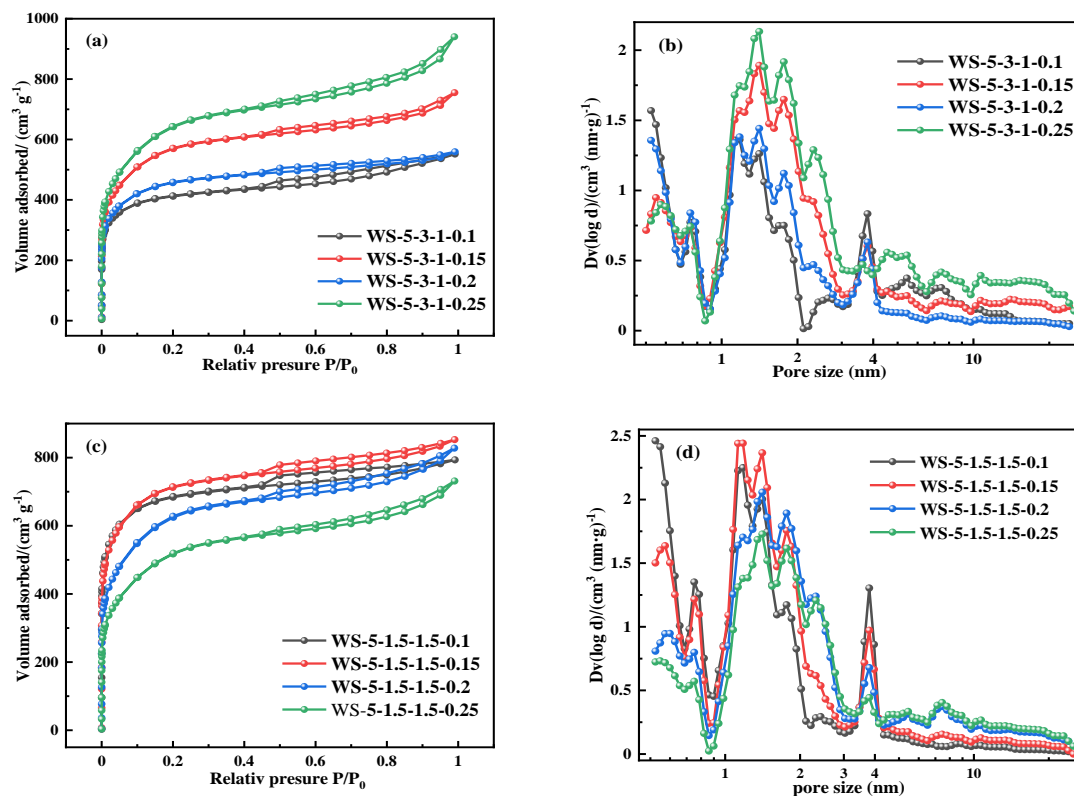

Figure S3. N<sub>2</sub> adsorption-desorption isotherms (a, c) and pore size distribution curves (b, d) of biochar.

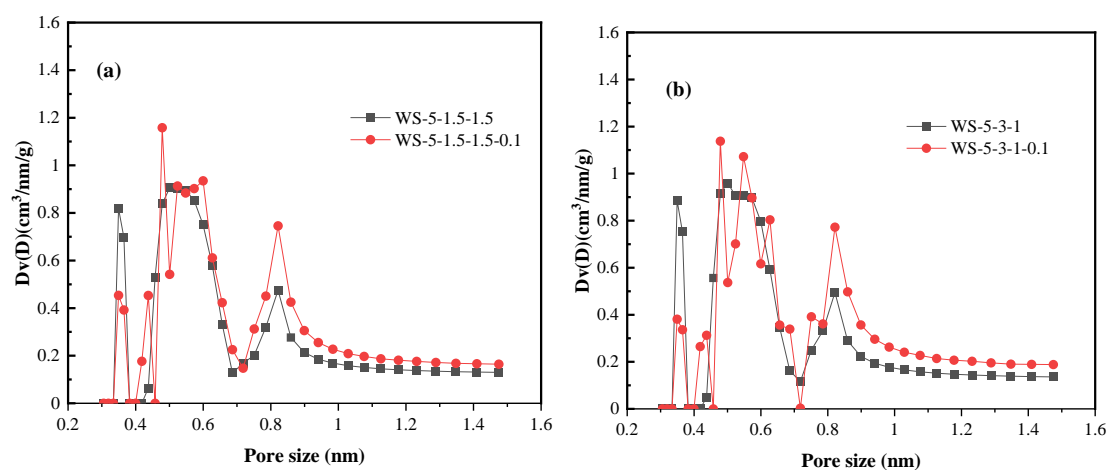

Figure S4. NMPD plot of (a) WS-5-1.5-1.5 and WS-5-1.5-1.5-0.1 and (b) WS-5-3-1 and WS-5-3-1-0.1.

**Table S1.** The effect of the activation ratio of biomass, metal salts and H<sub>2</sub>O (g) on the surface properties of biochar.

| Samples           | $S_{\text{BET}}/(\text{m}^2/\text{g})$ | $V_{\text{total}}(\text{cm}^3/\text{g})$ | $S_{\text{meso}}/(\text{m}^2/\text{g})$ | $V_{\text{meso}}(\text{cm}^3/\text{g})$ | $S_{\text{mic}}/(\text{m}^2/\text{g})$ | $V_{\text{mic}}(\text{cm}^3/\text{g})$ | $D_p(\text{nm})$ |
|-------------------|----------------------------------------|------------------------------------------|-----------------------------------------|-----------------------------------------|----------------------------------------|----------------------------------------|------------------|
| WS-5-1-3          | 1370.35                                | 0.63                                     | 45.37                                   | 0.06                                    | 1307.71                                | 0.54                                   | 1.84             |
| WS-5-1.5-1.5      | 1267.47                                | 0.54                                     | 24.96                                   | 0.03                                    | 1235.02                                | 0.49                                   | 1.69             |
| WS-5-3-1          | 1111.41                                | 0.49                                     | 30.15                                   | 0.05                                    | 1073.17                                | 0.43                                   | 1.75             |
| WS-5-3-0          | 836.55                                 | 0.43                                     | 68.37                                   | 0.11                                    | 762.67                                 | 0.31                                   | 2.07             |
| WS-5-0-3          | 960.93                                 | 0.45                                     | 40.80                                   | 0.06                                    | 909.68                                 | 0.37                                   | 1.85             |
| WS-5-1-3-0.1      | 1693.68                                | 0.94                                     | 146.25                                  | 0.25                                    | 1500.28                                | 0.64                                   | 2.23             |
| WS-5-1.5-1.5-0.1  | 2584.91                                | 1.28                                     | 171.75                                  | 0.21                                    | 2434.54                                | 1.01                                   | 1.90             |
| WS-5-3-1-0.1      | 1548.45                                | 0.85                                     | 177.31                                  | 0.27                                    | 1368.74                                | 0.58                                   | 2.20             |
| WS-5-3-0-0.1      | 1388.39                                | 0.64                                     | 79.92                                   | 0.11                                    | 1315.58                                | 0.53                                   | 1.85             |
| WS-5-0-3-0.1      | 1793.70                                | 1.03                                     | 158.54                                  | 0.30                                    | 1566.15                                | 0.67                                   | 2.30             |
| WS-5-3-1-0.15     | 2074.61                                | 1.17                                     | 158.28                                  | 0.31                                    | 1307.71                                | 0.54                                   | 2.25             |
| WS-5-3-1-0.2      | 1683.07                                | 0.87                                     | 128.84                                  | 0.18                                    | 1235.02                                | 0.49                                   | 2.06             |
| WS-5-3-1-0.25     | 2316.76                                | 1.46                                     | 252.81                                  | 0.51                                    | 1073.17                                | 0.43                                   | 2.51             |
| WS-5-1.5-1.5-0.15 | 2647.78                                | 1.32                                     | 178.95                                  | 0.25                                    | 2008.72                                | 0.54                                   | 1.99             |
| WS-5-1.5-1.5-0.2  | 2261.46                                | 2.58                                     | 174.42                                  | 0.33                                    | 1581.73                                | 0.40                                   | 2.26             |
| WS-5-1.5-1.5-0.25 | 1862.89                                | 1.13                                     | 166.81                                  | 0.34                                    | 1588.63                                | 0.69                                   | 2.42             |
